# Supplementary material for: Analysis of Surface Properties of Nickel Alloy Elements Exposed to Impulse Shot Peening with the Use of Positron Annihilation
Source: MDPI journal article supplement (doi:10.3390/ma14237328), 2021-11-30
Supplement: s1 [file s1]

# Analysis of Surface Properties of Nickel Alloy Elements Exposed to Impulse Shot Peening with the Use of Positron Annihilation

## Statistical analysis of results

One-way analysis of variance ANOVA (significance level  $\alpha = 0.05$ ) was employed to assess the significance of the effect of the technological shot peening parameters on the Sa and Sz roughness parameters, relative increase in microhardness  $\Delta HV_{0.05}$  (increase in microhardness caused by impulse shot peening compared to the post-milling value), and the mean positron lifetime  $\tau_{mean}$ . The analyzed variables had a normal distribution confirmed by the Shapiro-Wilk test, and their variances were homogeneous, as verified with the Levene test. The ANOVA analysis of variance could not be performed only for the mean positron lifetime  $\tau_{mean}$  as a function of shot peening density  $j$ . This was associated with the non-normal distribution of the values of the dependent variable  $\tau_{mean}$ .

Table S1 shows the results of ANOVA analysis of the roughness parameters Sa and Sz (the most frequently analyzed parameters in engineering practice).

**Table S1.** ANOVA analysis of variance for surface roughness parameters Sa and Sz in the applied conditions of impulse shot peening of samples made of the Inconel 718 nickel alloy, where: DF - number of the degrees of freedom, SS - sum of squares between groups, MS - mean sum of squares between groups, F - value of the test statistic, p - probability level.

|   | Sa |         |         |        |        |
|---|----|---------|---------|--------|--------|
|   | DF | SS      | MS      | F      | p      |
| E | 5  | 12.29   | 2.457   | 441.83 | 0.0000 |
| j | 3  | 8.69    | 2.899   | 506.46 | 0.0000 |
| D | 3  | 20.58   | 6.861   | 788.62 | 0.0000 |
|   | Sz |         |         |        |        |
|   | DF | SS      | MS      | F      | p      |
| E | 5  | 1496.82 | 299.363 | 358.81 | 0.0000 |
| j | 3  | 522.63  | 174.24  | 366.04 | 0.0000 |
| D | 3  | 1576.21 | 525.41  | 503.04 | 0.0000 |

Table S2 and S3 show the ANOVA results for the relative increase in microhardness  $\Delta HV_{0.05}$  and the mean positron lifetime  $\tau_{mean}$ , respectively. The analysis revealed that the technological parameters had a significant effect on the values of the 3D roughness parameters, relative microhardness increase, and  $\tau_{mean}$ . The probability level  $p$  for all the shot peening conditions is greater than the adopted significance level ( $\alpha = 0.05$ ), and the  $F_{(5;54)}$ ,  $F_{(5;28)}$ ,  $F_{(5;24)}$ ,  $F_{(3;36)}$ ,  $F_{(3;20)}$ , and  $F_{(3;16)}$  values are higher than  $F_{\alpha}$ .

**Table S2.** ANOVA analysis of variance for the mean positron lifetime  $\tau_{mean}$  in the applied conditions of impulse shot peening of samples made of the Inconel 718 nickel alloy, where: DF - number of the degrees of freedom, SS - sum of squares groups, F - value of the test statistic, p - probability level.

|   | $\tau_{mean}$ |        |       |        |        |
|---|---------------|--------|-------|--------|--------|
|   | DF            | SS     | MS    | F      | p      |
| E | 5             | 263.00 | 52.60 | 395.00 | 0.0000 |
| j | 3             | -      | -     | -      | -      |
| D | 3             | 97.50  | 32.50 | 285.00 | 0.0000 |

**Table S3.** ANOVA analysis of variance for the relative increase in microhardness  $\Delta$  HV 0.05 in the applied conditions of impulse shot peening of samples made of the Inconel 718 nickel alloy, where: DF - number of the degrees of freedom, SS - sum of squares between groups, MS - mean sum of squares between groups, F - value of the test statistic, p - probability level.

|   | $\Delta$ HV 0.05 |          |         |         |        |
|---|------------------|----------|---------|---------|--------|
|   | DF               | SS       | MS      | F       | p      |
| E | 5                | 19747.60 | 3949.50 | 66.39   | 0.0000 |
| j | 3                | 3700.39  | 1233.46 | 22.7341 | 0.0000 |
| D | 3                | 8229.90  | 2743.30 | 48.208  | 0.0000 |

The results of the ANOVA analysis of variance demonstrated statistically significant differences in the mean values of the roughness parameters Sa and Sz, the mean increase in microhardness  $\Delta$  HV 0.05, and the mean positron lifetime  $\tau_{\text{mean}}$  between the analyzed groups. The post-hoc test (Tukey test) was used to check which of the compared groups differed statistically significantly.

Tables S4 and S5 show the results of the post-hoc Tukey test for the dependent variables (roughness parameter Sa and Sz).

**Table S4.** Comparative analysis of the significance of differences (post-hoc Tukey test) between the mean values of the Sa roughness parameter after the impulse shot peening treatment with the use of different parameters. The red color indicates the level of probability for which there are no statistically significant differences.

| Sa  |                |                |                |                |              |         |         |         |         |
|-----|----------------|----------------|----------------|----------------|--------------|---------|---------|---------|---------|
| E   | 20             | 40             | 60             | 120            | 180          | 240     |         |         |         |
| 20  |                | 0.00013        | 0.00013        | 0.00013        | 0.00013      | 0.00013 |         |         |         |
| 40  | 0.00013        |                | 0.03866        | 0.00014        | 0.00013      | 0.00013 |         |         |         |
| 60  | 0.00013        | 0.03866        |                | <b>0.11642</b> | 0.00013      | 0.00013 |         |         |         |
| 120 | 0.00013        | 0.00014        | <b>0.11642</b> |                | 0.00013      | 0.00013 |         |         |         |
| 180 | 0.00013        | 0.00013        | 0.00013        | 0.00013        |              | 0.00013 |         |         |         |
| 240 | 0.00013        | 0.00013        | 0.00013        | 0.00013        | 0.00013      |         |         |         |         |
| j   | 44             | 25             | 11             | 6              | d            | 3.95    | 6.00    | 10.00   | 12.45   |
| 44  |                | <b>0.38754</b> | 0.00016        | 0.00016        | <b>3.95</b>  |         | 0.00016 | 0.00016 | 0.00016 |
| 25  | <b>0.38754</b> |                | 0.00016        | 0.00016        | <b>6.00</b>  | 0.00016 |         | 0.00016 | 0.00016 |
| 11  | 0.00016        | 0.00016        |                | 0.00016        | <b>10.00</b> | 0.00016 | 0.00016 |         | 0.00016 |
| 6   | 0.00016        | 0.00016        | 0.00016        |                | <b>12.45</b> | 0.00016 | 0.00016 | 0.00016 |         |

**Table S5.** Comparative analysis of the significance of differences (post-hoc Tukey test) between the mean values of the Sz roughness parameter after the impulse shot peening treatment with the use of different parameters. The red color indicates the level of probability for which there are no statistically significant differences.

| Sz  |         |         |                |                |              |         |         |         |         |
|-----|---------|---------|----------------|----------------|--------------|---------|---------|---------|---------|
| E   | 20      | 40      | 60             | 120            | 180          | 240     |         |         |         |
| 20  |         | 0.00014 | 0.00014        | 0.00014        | 0.00014      | 0.00014 |         |         |         |
| 40  | 0.00014 |         | 0.00014        | 0.00014        | 0.00014      | 0.00014 |         |         |         |
| 60  | 0.00014 | 0.00014 |                | <b>0.18366</b> | 0.00014      | 0.00014 |         |         |         |
| 120 | 0.00014 | 0.00014 | <b>0.18366</b> |                | 0.00049      | 0.00014 |         |         |         |
| 180 | 0.00014 | 0.00014 | 0.00014        | 0.00049        |              | 0.00014 |         |         |         |
| 240 | 0.00014 | 0.00014 | 0.00014        | 0.00014        | 0.00014      |         |         |         |         |
| j   | 44      | 25      | 11             | 6              | d            | 3.95    | 6.00    | 10.00   | 12.45   |
| 44  |         | 0.00016 | 0.00016        | 0.00016        | <b>3.95</b>  |         | 0.00016 | 0.00016 | 0.00016 |
| 25  | 0.00016 |         | 0.00022        | 0.00016        | <b>6.00</b>  | 0.00016 |         | 0.00016 | 0.00016 |
| 11  | 0.00016 | 0.00022 |                | 0.00016        | <b>10.00</b> | 0.00016 | 0.00016 |         | 0.00016 |
| 6   | 0.00016 | 0.00016 | 0.00016        |                | <b>12.45</b> | 0.00016 | 0.00016 | 0.00016 |         |

Tables S6 and S7 present the results for the  $\Delta HV$  0.05 variable and the dependent  $\tau_{mean}$  variable, respectively. The analysis demonstrated that the change in the impact energy from  $E = 60$  mJ to  $E = 120$  mJ did not have a statistically significant effect on the Sa and Sz values. Similarly, there were no statistically significant differences in the Sa roughness parameter values obtained at the shot peening density of  $j = 44$  mm<sup>-2</sup> and  $j = 25$  mm<sup>-2</sup>. The statistical analysis showed statistically significant differences in the values of the Sa and Sz parameters between all diameters of the peening ball  $d$ .

**Table S6.** Comparative analysis of the significance of differences (post-hoc Tukey test) between the mean values of the increase in microhardness after the impulse shot peening treatment with the use of different parameters. The red color indicates the level of probability for which there are no statistically significant differences.

| ΔHV 0.05 |         |         |         |         |         |         |         |         |         |
|----------|---------|---------|---------|---------|---------|---------|---------|---------|---------|
| E        | 20      | 40      | E<br>60 | 120     | 180     | 240     |         |         |         |
| 20       |         | 0.00025 | 0.00014 | 0.00014 | 0.00014 | 0.00014 |         |         |         |
| 40       | 0.00025 |         | 0.00964 | 0.00014 | 0.00014 | 0.00014 |         |         |         |
| 60       | 0.00014 | 0.00964 |         | 0.07554 | 0.00099 | 0.00023 |         |         |         |
| 120      | 0.00014 | 0.00014 | 0.07554 |         | 0.42485 | 0.10563 |         |         |         |
| 180      | 0.00014 | 0.00014 | 0.00099 | 0.42485 |         | 0.95929 |         |         |         |
| 240      | 0.00014 | 0.00014 | 0.00023 | 0.10563 | 0.95929 |         |         |         |         |
| j        | j       |         |         | d       |         |         |         |         |         |
| j        | 44      | 25      | 11      | 6       | d       | 3.95    | 6.00    | 10.00   | 12.45   |
| 44       |         | 0.02487 | 0.00049 | 0.00019 | 3.95    |         | 0.10772 | 0.00023 | 0.00018 |
| 25       | 0.02487 |         | 0.18217 | 0.00127 | 6.00    | 0.10772 |         | 0.00811 | 0.00019 |
| 11       | 0.00049 | 0.18217 |         | 0.08156 | 10.00   | 0.00023 | 0.00811 |         | 0.00078 |
| 6        | 0.00019 | 0.00127 | 0.08156 |         | 12.45   | 0.00018 | 0.00019 | 0.00078 |         |

**Table S7.** Comparative analysis of the significance of differences (post-hoc Tukey test) between the mean values of mean positron lifetimes  $\tau_{mean}$  after the impulse shot peening treatment with the use of different parameters. The red color indicates the level of probability for which there are no statistically significant differences.

| $\tau_{mean}$ |         |                |                |                |                |                |
|---------------|---------|----------------|----------------|----------------|----------------|----------------|
| E             | 20      | 40             | 60             | 120            | 180            | 240            |
| 20            |         | 0.00013        | 0.00013        | 0.00013        | 0.00013        | 0.00013        |
| 40            | 0.00013 |                | 0.00013        | 0.00013        | 0.00013        | 0.00013        |
| 60            | 0.00013 | 0.00013        |                | 0.00087        | 0.00020        | <b>0.66960</b> |
| 120           | 0.00013 | 0.00013        | 0.00087        |                | <b>0.95452</b> | 0.03398        |
| 180           | 0.00013 | 0.00013        | 0.00020        | <b>0.95452</b> |                | 0.00424        |
| 240           | 0.00013 | 0.00013        | <b>0.66960</b> | 0.03398        | 0.00424        |                |
| d             | 3.95    | 6.00           | 10.00          | 12.45          |                |                |
| 3.95          |         |                | 0.00041        | 0.02970        | 0.00017        |                |
| 6.00          | 0.00041 |                |                | <b>0.18245</b> | 0.00017        |                |
| 10.00         | 0.02970 | <b>0.18245</b> |                |                | 0.00017        |                |
| 12.45         | 0.00175 | 0.00017        |                | 0.00017        |                |                |

The analysis of the influence of technological parameters on the increase in microhardness  $\Delta HV$  0.05 (Table S6) showed no statistically significant effect of changes in the impact energy from  $E = 120$  mJ to  $E = 180$  mJ, from  $E = 120$  mJ to  $E = 240$  mJ, and from  $E = 180$  mJ to  $E = 240$  mJ on the analyzed dependent variable. There were no differences in the  $\Delta HV$  0.05 values between the shot peening density of  $j = 6$  mm<sup>-2</sup> and  $j = 11$  mm<sup>-2</sup> and between  $j = 11$  mm<sup>-2</sup> and  $j = 25$  mm<sup>-2</sup>. The change in the ball diameter  $d$  from 3.95 mm to 6.00 mm did not exert a significant effect on  $\Delta HV$  0.05.

The analysis of the results presented in Table S7 revealed no statistically significant differences in the mean positron lifetime  $\tau_{mean}$  upon the changes in impact energy from 60 mJ to 240 mJ and from 120 mJ to 180 mJ. Additionally, no statistically significant differ-

ences were found in the values of the mean positron lifetime between treatments with the different ball diameters of 6 mm or 10 mm.

The ANOVA analysis of variance for the surface roughness parameters, relative increase in microhardness  $\Delta HV$  0.05, and mean positron lifetime  $\tau_{\text{mean}}$  revealed a significant effect of the impulse shot-peening conditions on the results. Noteworthy is the absence of significant effects on the analyzed variables in the case of most of the same peening conditions. This may indicate that there is a correlation between the values of microhardness, surface roughness, and mean positron lifetimes.

### Surface non-homogeneity

In the case of the use of relatively high energies ( $E = 180$  mJ) and small balls ( $d = 6.00$  mm), the dispersion of the mean lifetime significantly exceeded the statistical uncertainty when the measurements were conducted in randomly selected locations of the positron source (Figure S1). This indicates non-homogeneity of the surface and requires systematic surface scanning and averaging the results in order to obtain reliable measurement results. Hence, a specialized stand is required to control the location of the positron source relative to the sample.

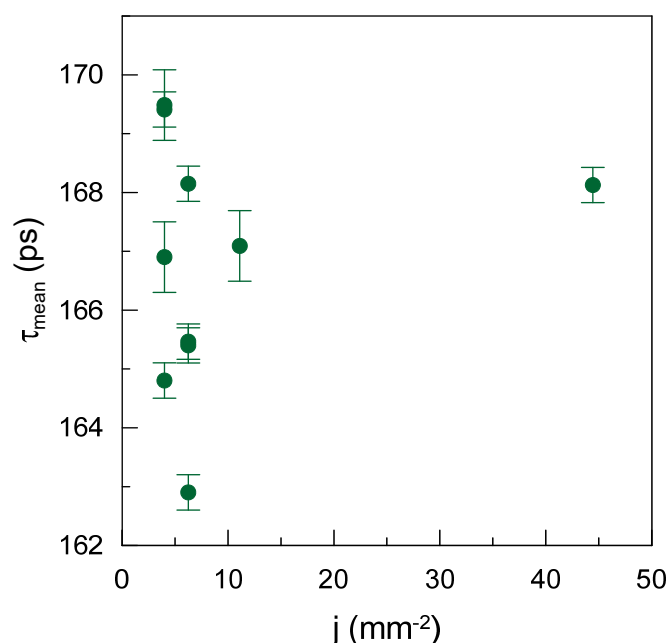

**Figure S1.** Dependence of the mean positron lifetime  $\tau_{\text{mean}}$  on the shot peening density  $j$  ( $E = 180$  mJ,  $d = 6.00$  mm).
